# Supplementary material for: High-Grade Pleomorphic Sarcomas Treated with Immune Checkpoint Blockade: The MD Anderson Cancer Center Experience
Source: MDPI journal article supplement (doi:10.3390/cancers16091763), 2024-05-01

**Title:** Undifferentiated Sarcomas Treated with Immune Checkpoint Blockade: The MD Anderson Cancer Center Experience

**Supplemental Table S1.** Overall Survival according to clinical characteristics.

**Supplemental Table S2.** Patient and disease characteristics by exposure to RT prior to ICB

**Supplemental Table S3.** Patient and disease characteristics by type ICB treatment

**Supplemental Figure S1.** Progression-free survival in patients with previous RT comparing peri-op vs metastatic RT

**Supplemental Figure S2.** Overall Survival stratified by exposure to RT prior to ICB

**Supplemental Figure S3.** Overall Survival stratified by number of lines of systemic therapy prior to ICB

**Supplemental Figure S4.** Overall Survival stratified by type of ICB treatment

**Supplemental Table S1.** Overall Survival according to clinical characteristics.

| Variable                                     | Number of Patients | Median OS (months, IQR) | Univariate HR (95%CI)  | p-Value      |
|----------------------------------------------|--------------------|-------------------------|------------------------|--------------|
| <b>Sex</b>                                   | -                  | -                       | 1.04 (0.43-2.55)       | 0.93         |
| Male                                         | 24                 | 14.6 (1.1-67.8)         | -                      | -            |
| Female                                       | 12                 | 12.9 (5-35.2)           | -                      | -            |
| <b>Race</b>                                  | -                  | -                       | 0.25 (0.05-1.2)        | 0.08         |
| Caucasian                                    | 31                 | 14.6 (1.3-67.8)         | -                      | -            |
| African American                             | 5                  | 5.3 (1.1-13.1)          | -                      | -            |
| <b>Age</b>                                   | -                  | -                       | 1.4 (0.6-3.4)          | 0.92         |
| 0-65                                         | 25                 | 12.9 (5.5-17.6)         | -                      | -            |
| >65 years                                    | 11                 | 18.6 (3.5-20.3)         | -                      | -            |
| <b>Histology</b>                             | -                  | -                       | 0.95 (0.4-2.25)        | 0.90         |
| UPS                                          | 26                 | 8.9 (5.3-18.4)          | -                      | -            |
| Other unclassified pleomorphic               | 10                 | 10.2 (5-19.8)           | -                      | -            |
| <b>Previous Radiotherapy</b>                 | -                  | -                       | <b>0.44 (0.2-0.99)</b> | <b>0.047</b> |
| Yes                                          | 22                 | 7.9 (2.1-14.5)          | -                      | -            |
| No                                           | 14                 | 17.5 (8.1-34.4)         | -                      | -            |
| <b>ICB Combination Type</b>                  | -                  | -                       | 0.5 (0.23-1.12)        | 0.094        |
| Standalone                                   | 15                 | 13.1 (3.6-32.3)         | -                      | -            |
| Combination                                  | 21                 | 8 (5.2-17.6)            | -                      | -            |
| <b>Number of previous Systemic Therapies</b> | -                  | -                       | 0.78 (0.35-1.7)        | 0.53         |
| ≤2                                           | 19                 | 12.9 (5-18.1)           | -                      | -            |
| >2                                           | 17                 | 7.5 (5.2-20.9)          | -                      | -            |
| <b>Lung Metastasis</b>                       | -                  | -                       | 1.02 (0.4-2.59)        | 0.96         |
| Yes                                          | 26                 | 12 (5.7-20.4)           | -                      | -            |

|                         |    |                 |                 |      |
|-------------------------|----|-----------------|-----------------|------|
| No                      | 10 | 5.8 (4.2-12.9)  | -               | -    |
| <b>Liver Metastasis</b> | -  | -               | 0.88 (0.24-3.1) | 0.84 |
| Yes                     | 4  | 6.5 (4.8-22.9)  | -               | -    |
| No                      | 32 | 10.3 (5.2-19.2) |                 | -    |

OS = overall survival; ICB= Immune Checkpoint Blockade; HR = hazard ratio; RT = Radiotherapy; UPS = undifferentiated pleomorphic sarcoma; Values in bold have p-value < 0.05

**Supplemental Table S2.** Patient and disease characteristics stratified by exposure to RT prior to ICB

| Characteristic                                      | Category                                           | N (%) / median [range] |                      | p-value      |
|-----------------------------------------------------|----------------------------------------------------|------------------------|----------------------|--------------|
|                                                     |                                                    | Previous RT<br>N= 22   | No prior RT<br>N=14  |              |
| Age at first ICB (years)                            | All<br>>65 years                                   | 53 [22-79]<br>6 (27)   | 52 [33-78]<br>5 (36) | 0.8          |
| Sex                                                 | Male                                               | 17 (77)                | 7 (50)               | 0.2          |
|                                                     | Female                                             | 5 (23)                 | 7 (50)               |              |
| Race                                                | Caucasian                                          | 19 (86)                | 12 (86)              | 0.9          |
|                                                     | African American                                   | 3 (14)                 | 2 (14)               |              |
| ECOG performance status                             | 0                                                  | 5 (23)                 | 6 (43)               | 0.3          |
|                                                     | 1                                                  | 15 (68)                | 8 (57)               |              |
|                                                     | 2                                                  | 2 (9)                  | 0 (0)                |              |
| BMI                                                 |                                                    | 32 [20-50]             | 28 [24-52]           | 0.3          |
| Histology                                           | UPS                                                | 17 (77)                | 9 (64)               | 0.6          |
|                                                     | Other unclassified<br>pleomorphic                  | 5 (23)                 | 5 (36)               |              |
| Biggest tumor diameter at<br>start of ICB (cm)      |                                                    | 7.7 [1.3,25]           | 4 [1.5,14.2]         | <b>0.027</b> |
| Lung metastasis                                     |                                                    | 16 (73)                | 10 (71)              | 1            |
| Liver metastasis                                    |                                                    | 3 (14)                 | 1 (7)                | 1            |
| Site of primary tumor                               | Extremities                                        | 9 (41)                 | 6 (43)               |              |
|                                                     | Chest                                              | 10 (45)                | 5 (36)               |              |
|                                                     | Other*                                             | 3 (14)                 | 3 (21)               |              |
| Number of surgical<br>resections prior to ICB       |                                                    | 2 [0-8]                | 2 [0-4]              | 0.3          |
| Number of lines of systemic<br>therapy prior to ICB |                                                    | 2 [0-10]               | 3 [0-5]              | 0.3          |
| Type of ICB** treatment                             | Standalone ICB                                     | 11 (50)                | 4 (29)               | 0.11         |
|                                                     | Combination of<br>ICB + ICB                        | 10 (45)                | 6 (43)               |              |
|                                                     | Combination of<br>ICB + RT                         | 0 (0)                  | 3 (21)               |              |
|                                                     | Combination of<br>ICB + chemo or<br>antiangiogenic | 1 (5)                  | 1 (7)                |              |
|                                                     |                                                    |                        |                      |              |
| Received ICB as part of a<br>clinical trial         |                                                    | 14 (64)                | 11 (79)              | 0.6          |
| Best response to ICB                                | Partial/complete                                   | 2 (9)                  | 1 (7)                | 0.074        |
|                                                     | Response                                           | 2 (9)                  | 7 (50)               |              |
|                                                     | Stable Disease                                     | 16 (73)                |                      |              |

|                        |       |        |
|------------------------|-------|--------|
| Progressive<br>Disease | 2 (9) | 5 (36) |
| Unknown                |       | 1 (7)  |

\*Other sites of disease include abdomen, heart, and lumbar spine

\*\* ICB drugs used: atezolizumab, durvalumab, ipilimumab, nivolumab, pembrolizumab, tremelimumab

**Abbreviations:** ICB, immune checkpoint blockade; ECOG, Eastern Cooperative Oncology Group; BMI, Body Mass Index; UPS, undifferentiated pleomorphic sarcoma; RT, radiotherapy

**Supplemental Table S3.** Patient and disease characteristics by type ICB treatment

| Characteristic                                   | Category                       | N (%) / median [range]  |                     | p-value      |
|--------------------------------------------------|--------------------------------|-------------------------|---------------------|--------------|
|                                                  |                                | Standalone ICB<br>N= 15 | Combination<br>N=21 |              |
| Age at first ICB (years)                         | All                            | 57 [36, 79]             | 51 [22, 78]         | 0.064        |
| Sex                                              | Female                         | 3 (20)                  | 9 (43)              | 0.3          |
|                                                  | Male                           | 12 (80)                 | 12 (57)             |              |
| Race                                             | African American               | 4 (27)                  | 1 (5)               | 0.2          |
|                                                  | Caucasian                      | 11 (73)                 | 20 (95)             |              |
| ECOG performance status                          | 0                              | 4 (27)                  | 7 (33)              | 0.2          |
|                                                  | 1                              | 9 (60)                  | 14 (67)             |              |
|                                                  | 2                              | 2 (13)                  | 0 (0)               |              |
| BMI                                              |                                | 30 [24, 52]             | 31 [20, 44]         | 0.2          |
| Histology                                        | UPS                            |                         | 15 (71)             | 1            |
|                                                  | Other unclassified pleomorphic | 11 (73)<br>4 (27)       | 6 (29)              |              |
| Biggest tumor diameter at start of ICB (cm)      |                                | 9.5 [1.5, 22.0]         | 5.0 [1.3, 25.0]     | 0.2          |
| Lung metastasis                                  |                                | 10 (67)                 | 16 (76)             | 0.8          |
| Liver metastasis                                 |                                | 1 (7)                   | 3 (14)              | 0.9          |
| Site of primary tumor                            | Chest                          | 5 (33)                  | 10 (48)             | 0.7          |
|                                                  | Extremities                    | 7 (47)                  | 8 (38)              |              |
|                                                  | Other*                         | 3 (20)                  | 3 (14)              |              |
| Number of surgical resections prior to ICB       |                                | 1 [0, 3]                | 2 [0, 8]            | <b>0.013</b> |
| Number of lines of systemic therapy prior to ICB |                                | 2 [0, 5]                | 3 [0, 10]           | 0.062        |
| Previous RT prior to ICB                         |                                | 11 (73)                 | 11 (52)             | 0.4          |
| Received ICB as part of a clinical trial         |                                | 6 (40)                  | 19 (90)             | <b>0.004</b> |
| Best response to ICB                             | Partial/complete               |                         |                     | 0.6          |
|                                                  | Response                       | 2 (14)                  | 1 (5)               |              |
|                                                  | Stable Disease                 | 3 (20)                  | 13 (61)             |              |
|                                                  | Progressive Disease            | 8 (53)                  | 6 (29)              |              |
|                                                  | Unknown                        | 2 (13)                  | 1 (5)               |              |

**Abbreviations:** ICB, immune checkpoint blockade; ECOG, Eastern Cooperative Oncology Group; BMI, Body Mass Index; UPS, undifferentiated pleomorphic sarcoma; RT, radiotherapy

\* Other sites of disease include abdomen, heart, and lumbar spine

**Supplemental Figure S1.** Progression-free survival in patients with previous RT comparing peri-op vs metastatic RT

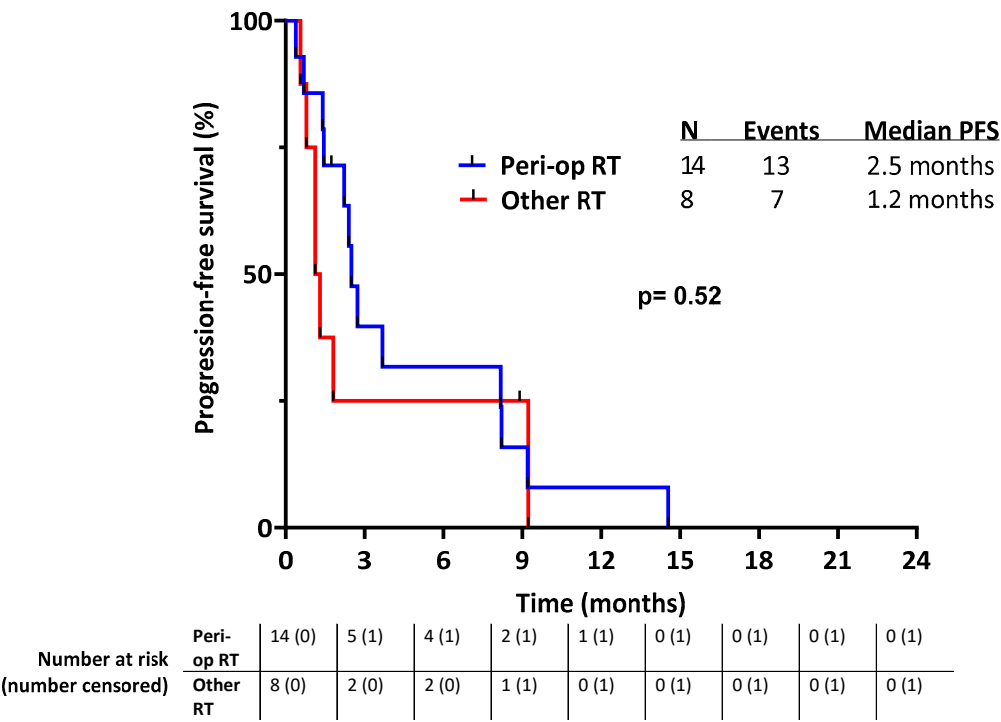

Supplemental Figure S2. Overall Survival stratified by exposure to RT prior to ICB

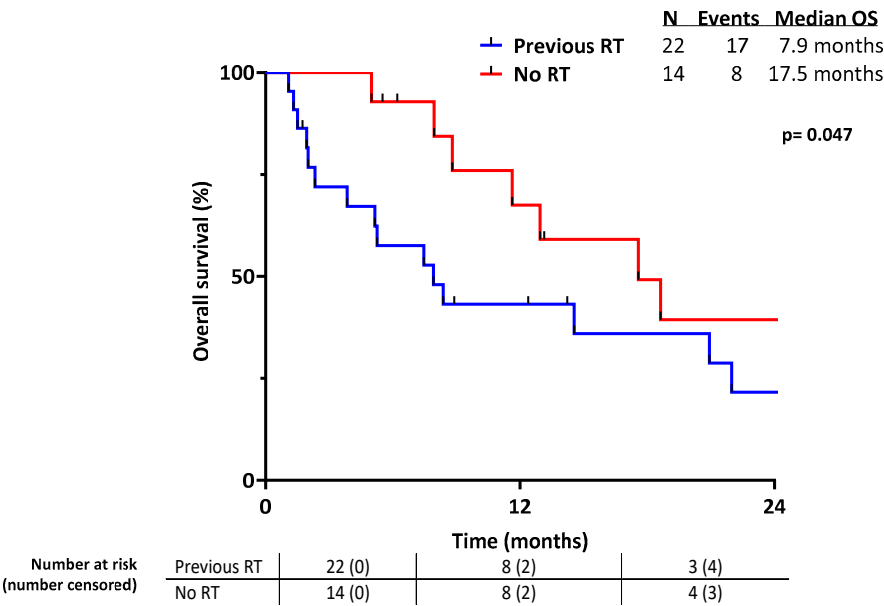



**Supplemental Figure S3.** Overall Survival stratified by number of lines of systemic therapy prior to ICB

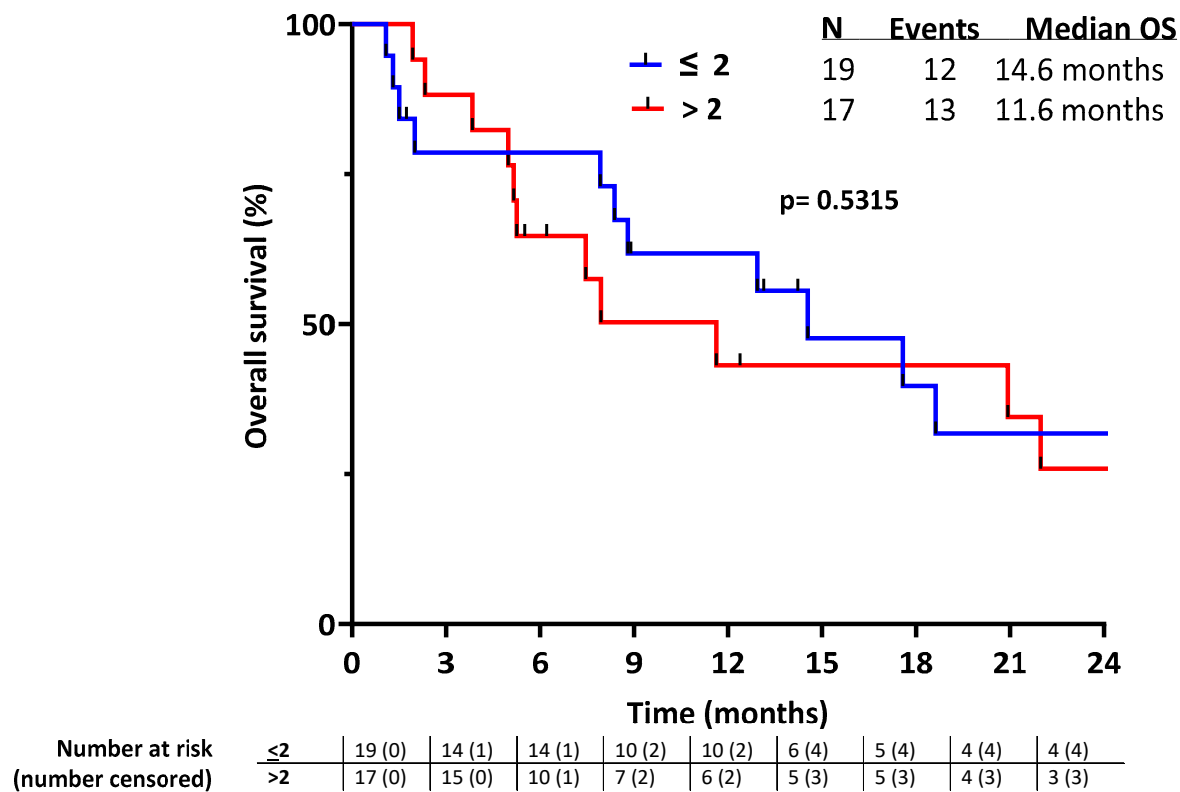

Supplemental Figure S4. Overall Survival stratified by type of ICB treatment

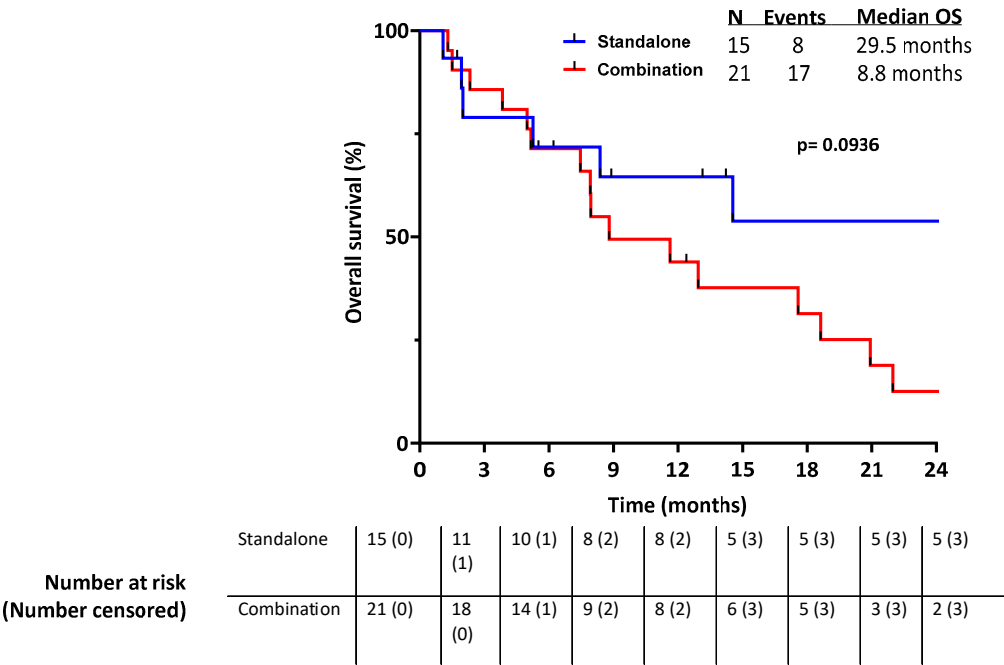

Supplement: s1 [file s1]
